# Supplementary figures and images for: The dual-effects of PLGA@MT electrospun nanofiber coatings on promoting osteogenesis at the titanium–bone interface under diabetic conditions
Source: Royal Society of Chemistry journal article supplement (doi:10.1039/d2tb00120a), 2022-01-01

# GAPDH

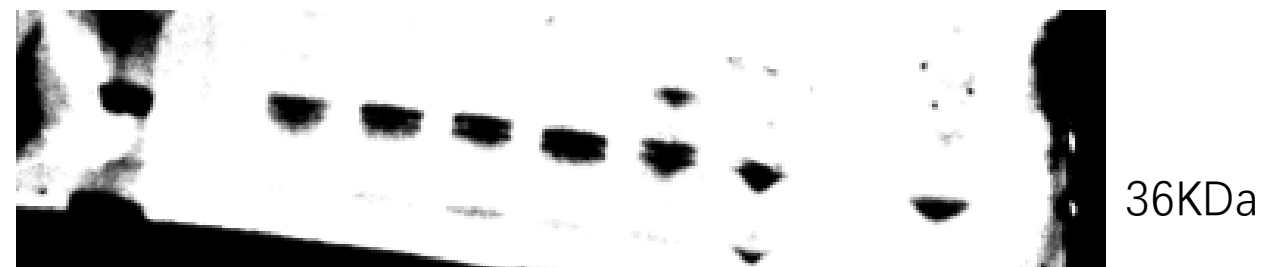

# RUNX2

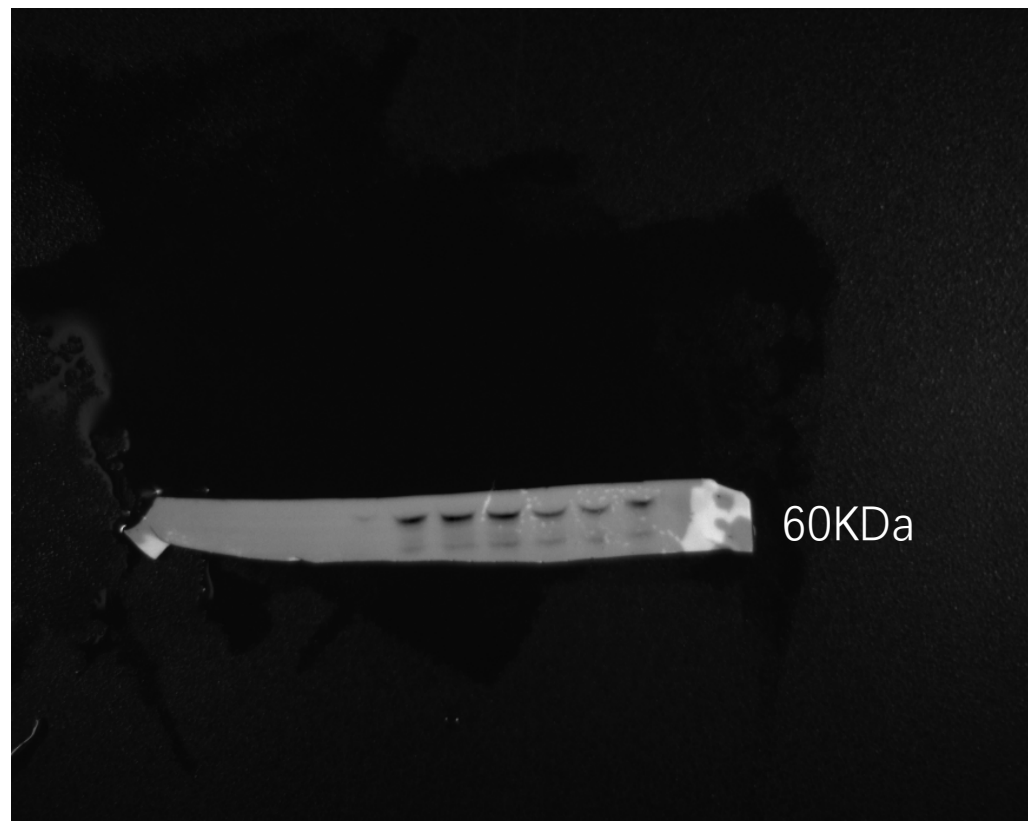

# ALP (70KDa)

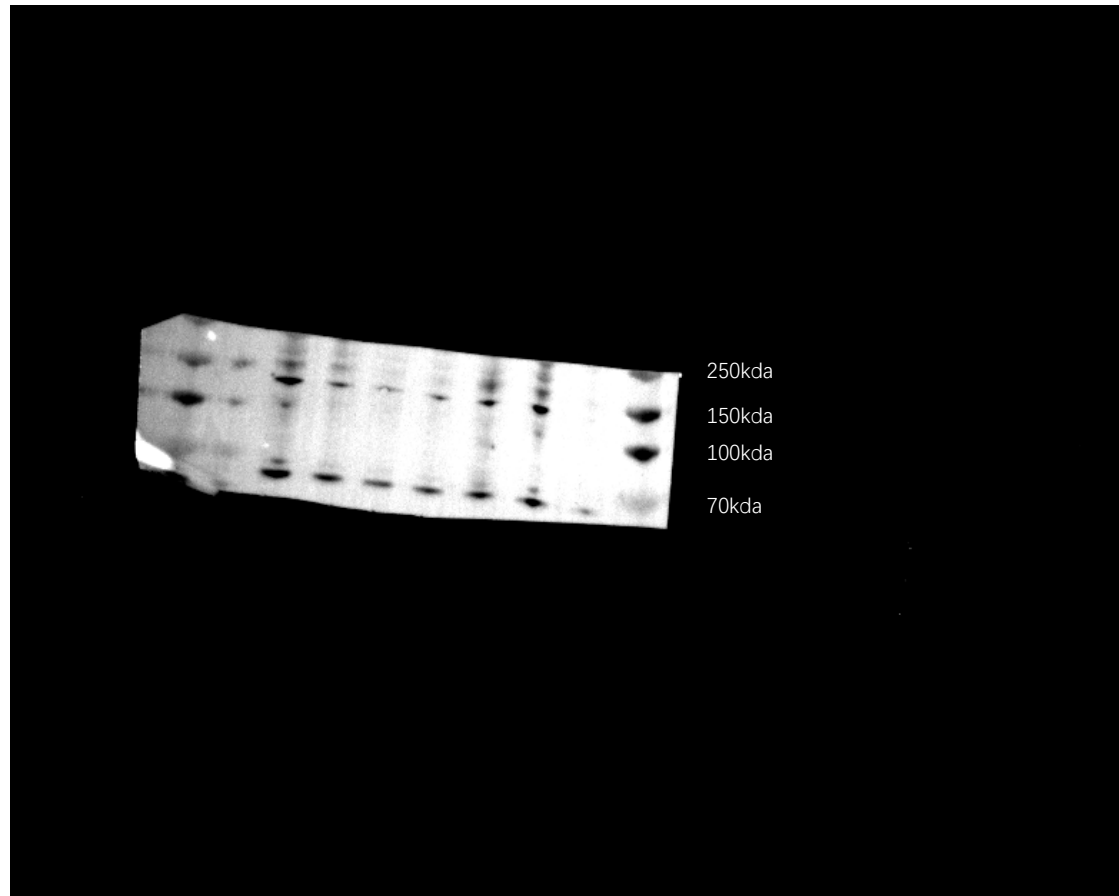

Supplement: d2tb00120a1.pdf [file d2tb00120a1.pdf]
